# Supplementary material for: High electrochemical performance based on ultrathin porous CuO nanobelts grown on Cu substrate as integrated electrode
Source: Royal Society of Chemistry journal article supplement (doi:10.1039/c2cp43501b), 2012-11-05
Supplement: c2cp43501b.pdf [file c2cp43501b.pdf]

## Supporting Informations

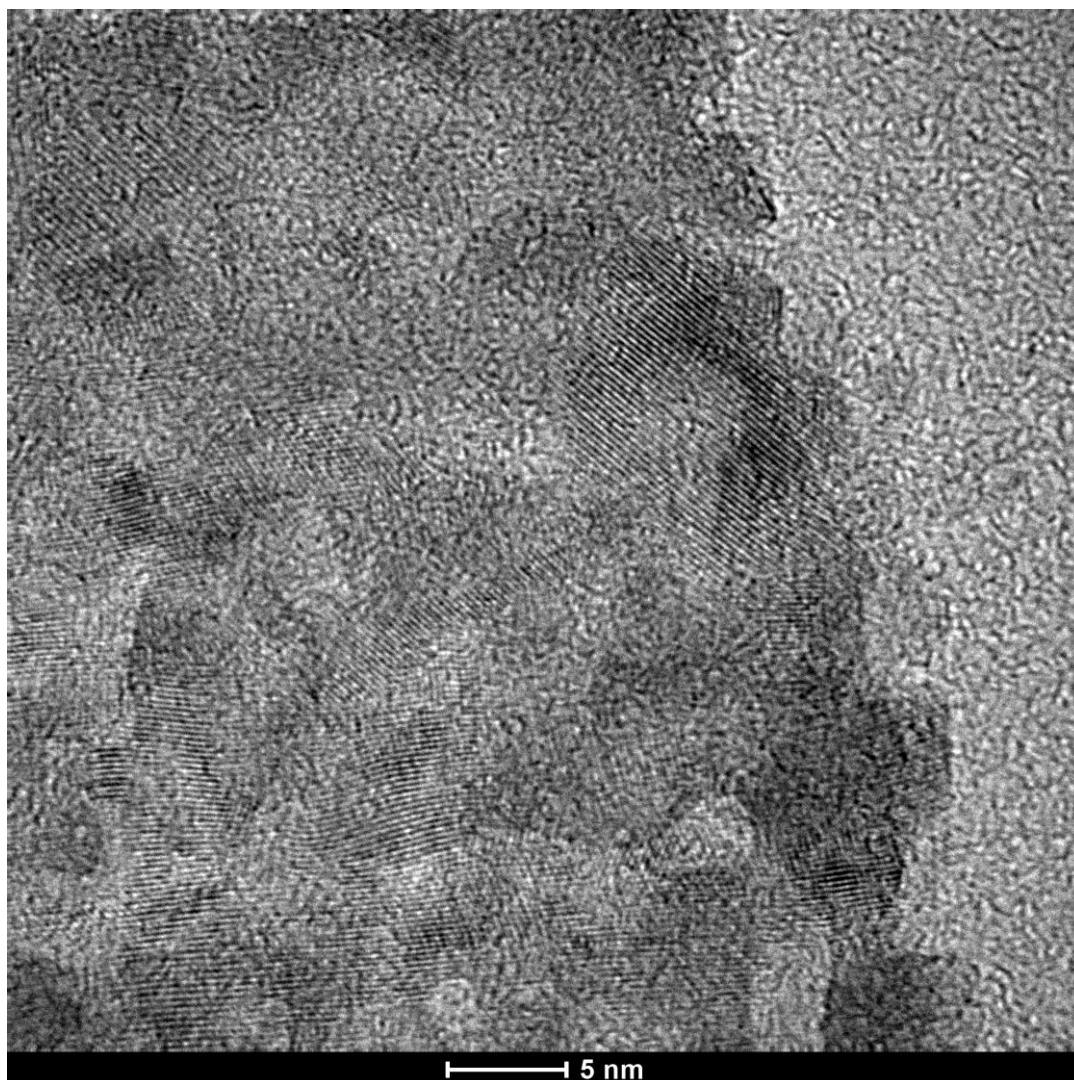

**Figure S1** Enlarged HRTEM images of porous CuO nanobelt

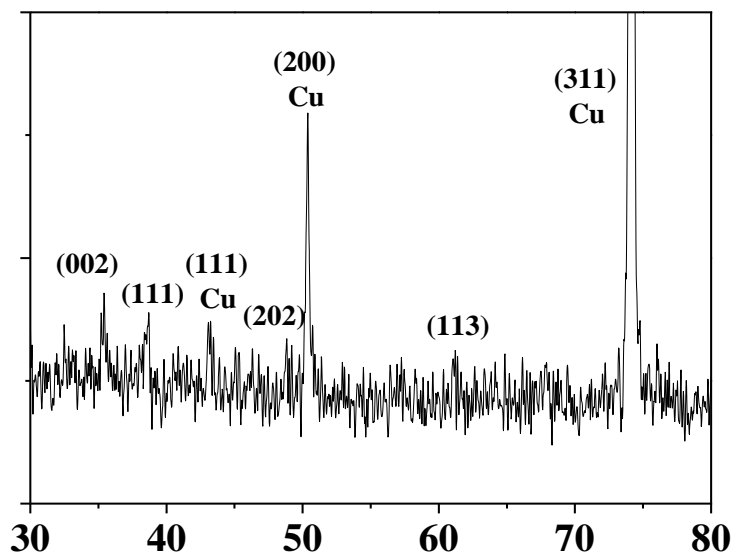

**Figure S2** XRD patterns of porous CuO nanobelts
